# Supplementary material for: HCV Core Protein Uses Multiple Mechanisms to Induce Oxidative Stress in Human Hepatoma Huh7 Cells
Source: PubMed Central journal article supplement (PMC4488712; doi:10.3390/v7062745), 2015-05-29
Supplement: viruses-07-02745-s001.pdf [file viruses-07-02745-s001.pdf]

## SUPPLEMENTARY MATERIAL

**Table S1**

HPLC analysis of DHE oxidation products in Huh7 cells transfected with pVax1 or a plasmid expressing the full-length HCV core protein

| Plasmid, used for transfection of Huh7 cells | Peak Intensity (mV*s) |                 |
|----------------------------------------------|-----------------------|-----------------|
|                                              | 2-OH-E <sup>+</sup>   | E <sup>+</sup>  |
| pVax1                                        | 0.09 ± 0.02 (3)       | 0.83 ± 0.19 (3) |
| pCMV-Core(1-191)                             | 0.79 ± 0.18 (3)       | 0.16 ± 0.06 (3) |

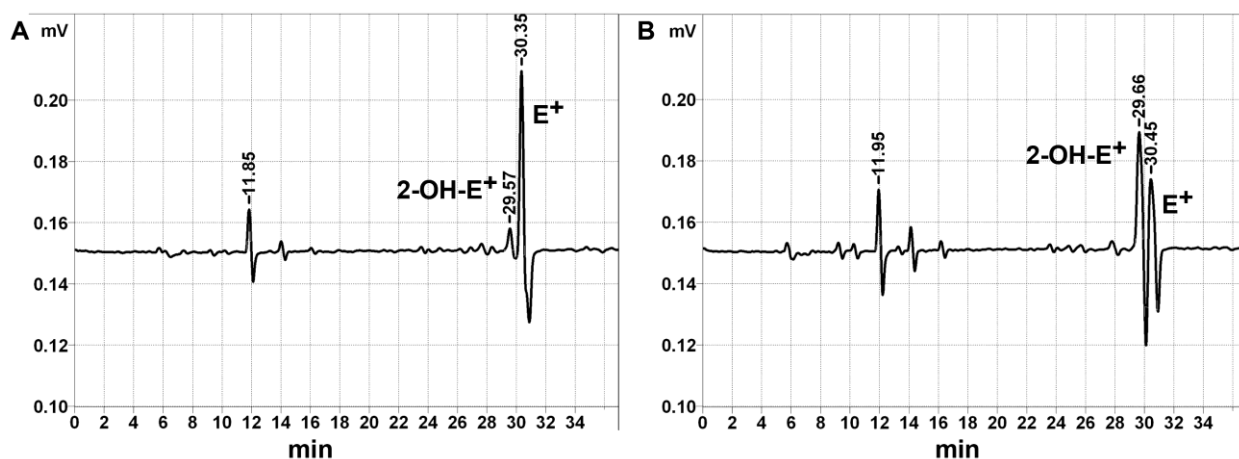

**Fig. S1.** HPLC chromatogram of the extract of Huh7 cells transfected with pVax1 vector or a plasmid expressing HCV core protein. Huh7 cells were seeded on 100 mm culture dishes, transfected with the plasmid expressing core(1-191) or an empty pVax1 vector, treated 36 h post-transfection with DHE for 10 min and harvested. The samples were prepared and analyzed by HPLC as described by J. Zielonka *et al* (Nature Protocols, 2008). The superoxide-specific (2-OH-E<sup>+</sup>) and unspecific (E<sup>+</sup>) products were detected by measurement of fluorescence at 510/595 nm.

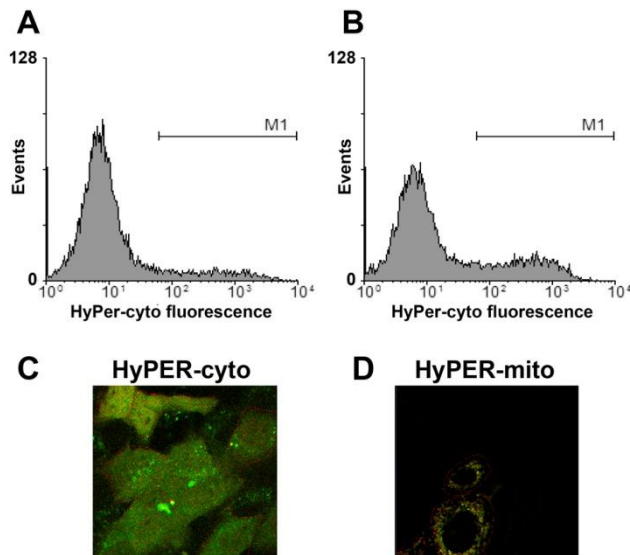

**Figure S2.** Representative distribution of the fluorescence levels in Huh7 cells co-transfected with HyPer-cyto and pVax1 (A) or core(1-191) expressing plasmid (B) evaluated by flow cytometry with excitation at 488 nm and detection at 535 nm. Gate M1 was set to exclude >99% of the untransfected Huh7 cells.

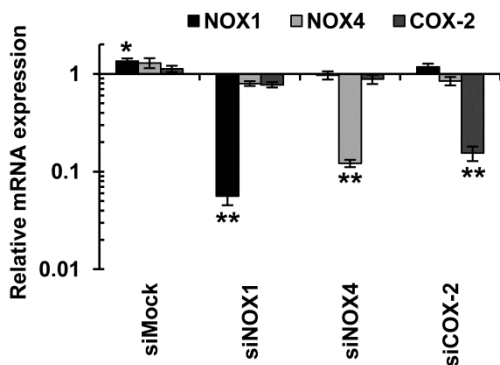

**Figure S3.** Down-regulation of the expression of NOX1, NOX4, and COX-2 genes using respective siRNAs. Huh7 cells were transfected with siRNA against NOX1, NOX4, or COX-2 siRNAs. Huh7 cells transfected with mock siRNA served as a negative control. Expression of the respective genes was analyzed by RT-qPCR and normalized to the expression of  $\beta$ -actin. The data represent the means  $\pm$  S.D. from the triplicate measurements done in three independent experiments. \* $P < 0.01$ ; \*\* $P < 0.001$ .
